# Supplementary material
Source: Research Square preprint supplement (doi:10.21203/rs.3.rs-9452430/v1)
Supplement: Supplementary file 1 [file d8aefe70f7c83d0935aa88f6.pdf]

# Supplementary material

## *Photocatalytic Pavements as an Active CO<sub>2</sub> Mitigation Tool: Quantifying the CO<sub>2</sub> Removal Potential of TiO<sub>2</sub>-based Concrete Surface Treatments*

Marina Lopez-Arias<sup>1,2</sup>, Rui Bai<sup>1</sup>, Mirian Velay-Lizancos<sup>\*1</sup>

<sup>1</sup> Lyles School of Civil and Construction Engineering, Purdue University, West Lafayette, IN 47907, USA.

<sup>2</sup> Department of Civil and Environmental Engineering, University of California, Merced, Merced, CA, USA

\*Corresponding author, E-mail address: [mvelayli@purdue.edu](mailto:mvelayli@purdue.edu). Phone number: +1 (765) 494-2209. Address: 550 W Stadium Ave. Hampton building - Lyles School of Civil Engineering. West Lafayette, IN, 47907 (USA). 16-digit ORCID: 0000-0002-1539-7923

### S.1. Raw data

The raw data from the CO<sub>2</sub> photoreduction tests are presented in Figures S.1 to S.6. It is important to note that the samples under no photoreduction mechanism (reference) experience high variability, whereas the samples experiencing CO<sub>2</sub> photoreduction show a clear CO<sub>2</sub> reduction trend.

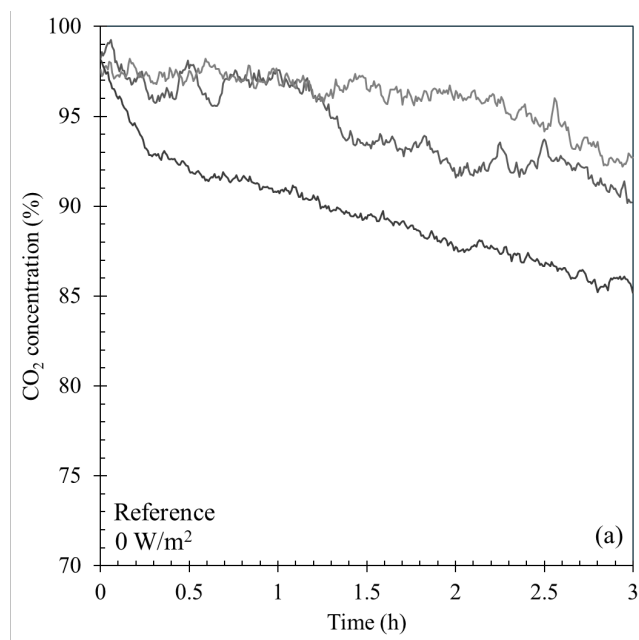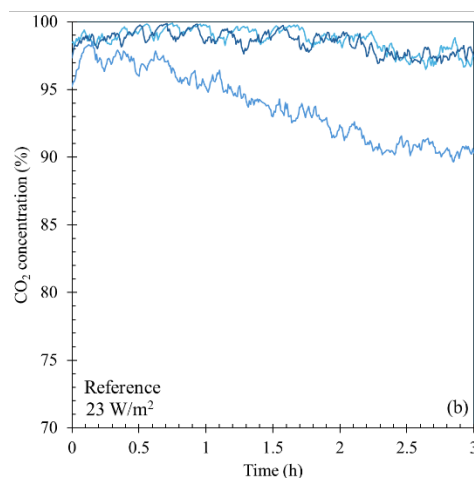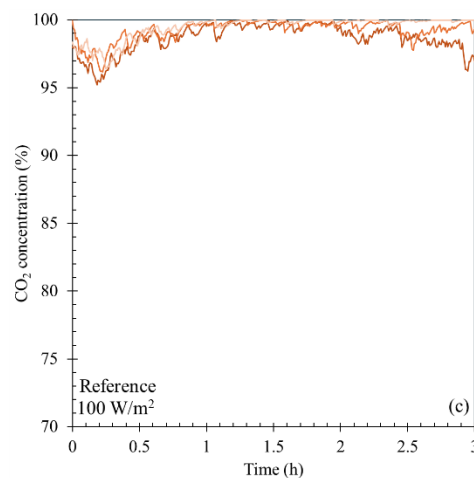

**Figure S.1.** CO<sub>2</sub> reduction tests raw data for the three reference samples exposed to 100% CO<sub>2</sub> initial concentration: (a) under 0 W/m<sup>2</sup>, (b) under 23 W/m<sup>2</sup>, and (c) under 100 W/m<sup>2</sup>.

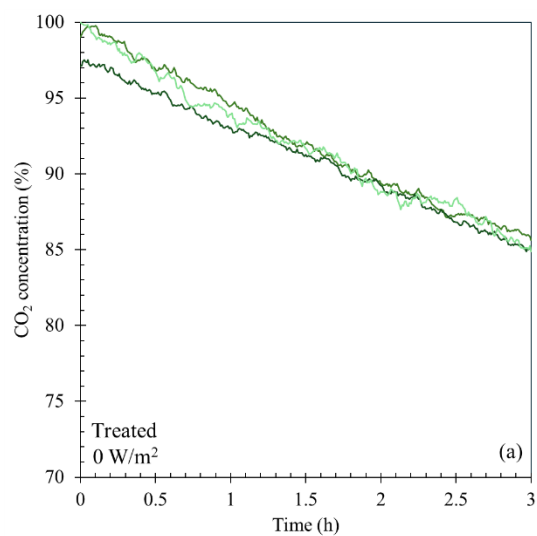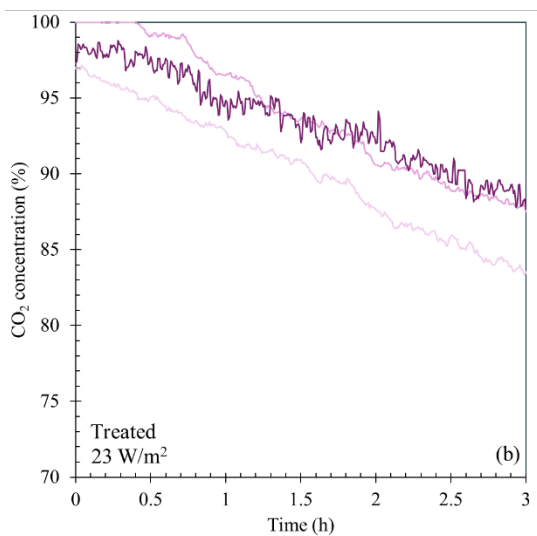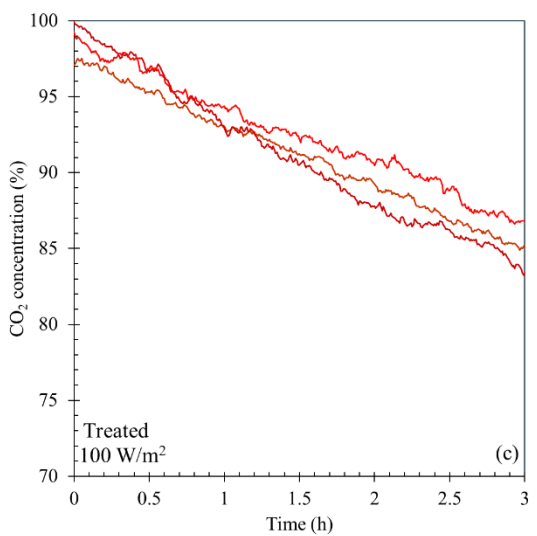

**Figure S.2.** CO<sub>2</sub> reduction tests raw data for the three TiO<sub>2</sub>-treated samples exposed to 100% CO<sub>2</sub> initial concentration: (a) under 0 W/m<sup>2</sup>, (b) under 23 W/m<sup>2</sup>, and (c) under 100 W/m<sup>2</sup>.

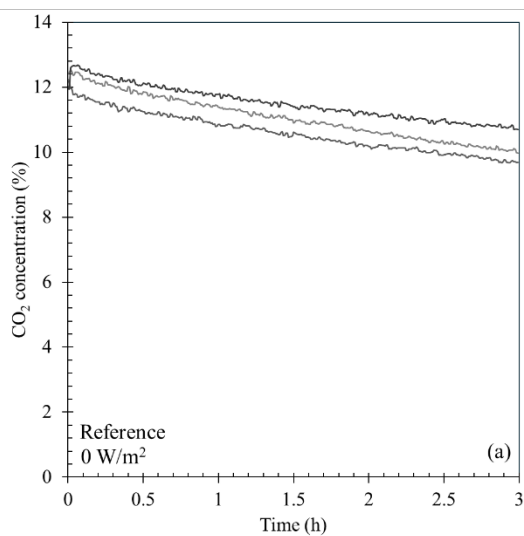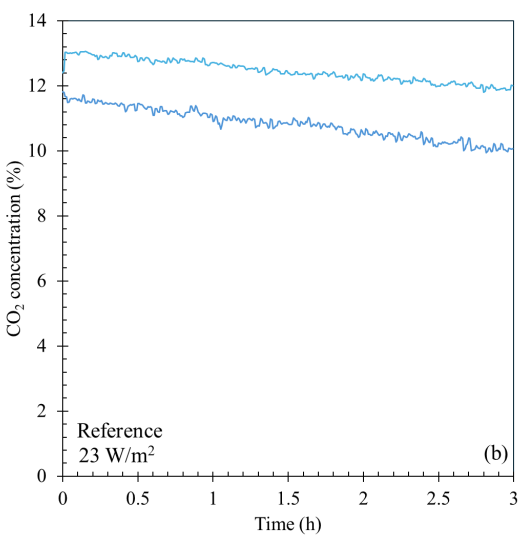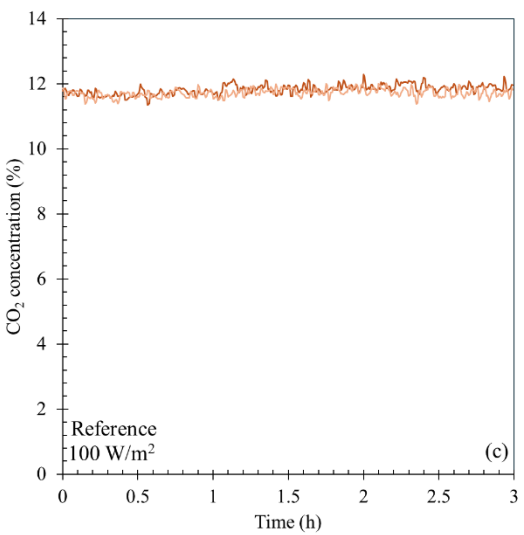

**Figure S.3.** CO<sub>2</sub> reduction tests raw data for the three reference samples exposed to 12% CO<sub>2</sub> initial concentration: (a) under 0 W/m<sup>2</sup>, (b) under 23 W/m<sup>2</sup>, and (c) under 100 W/m<sup>2</sup>.

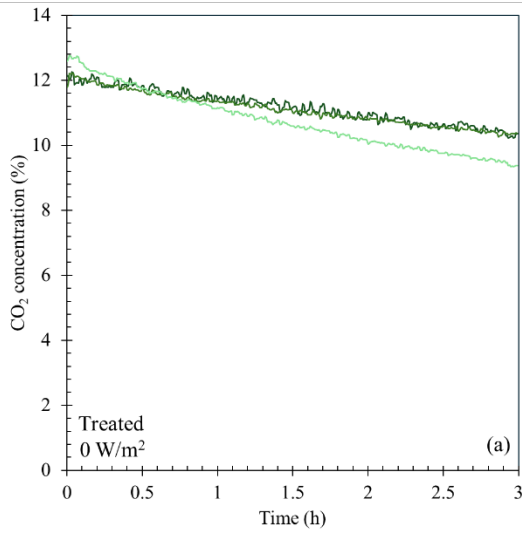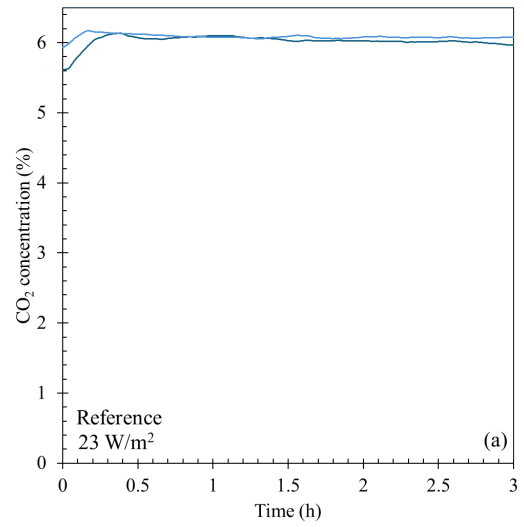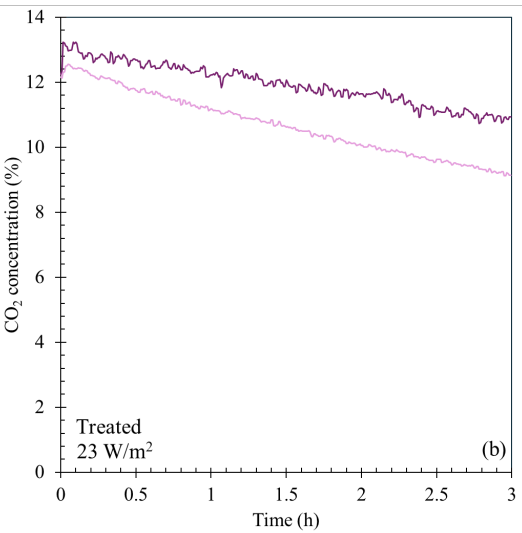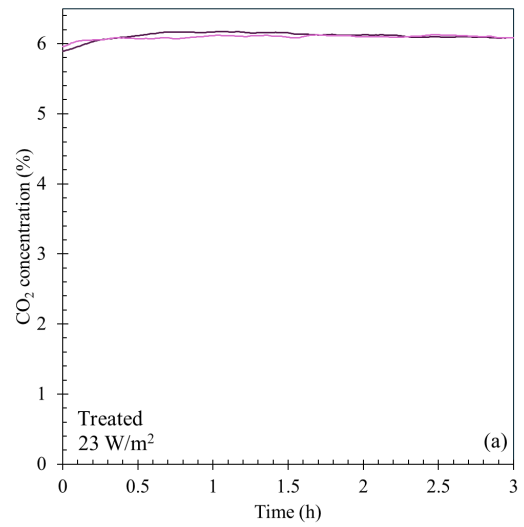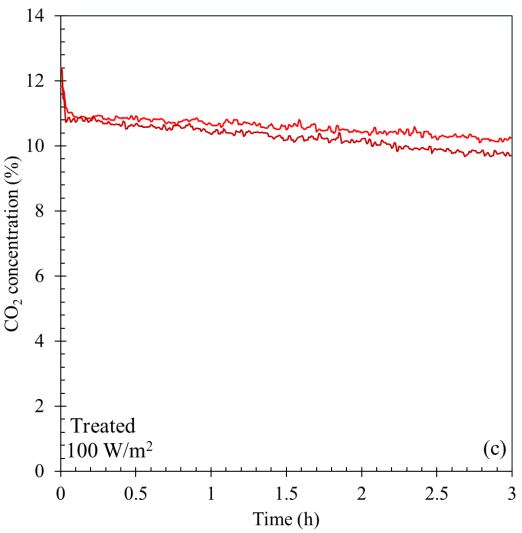

**Figure S.5.** CO<sub>2</sub> reduction tests raw data for the three reference samples exposed to 6% CO<sub>2</sub> initial concentration: (a) under 23 W/m<sup>2</sup>, and (b) under 100 W/m<sup>2</sup>.

**Figure S.4.** CO<sub>2</sub> reduction tests raw data for the two TiO<sub>2</sub>-treated samples exposed to 12% CO<sub>2</sub> initial concentration: (a) under 0 W/m<sup>2</sup>, (b) under 23 W/m<sup>2</sup>, and (c) under 100 W/m<sup>2</sup>.

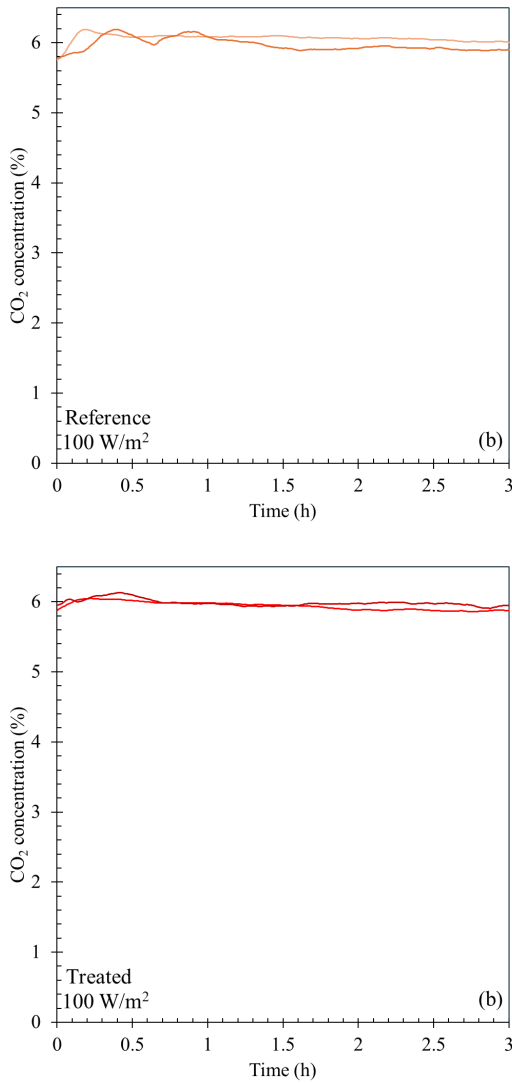

**Figure S.6.** CO<sub>2</sub> reduction tests raw data for the two TiO<sub>2</sub>-treated samples exposed to 6% CO<sub>2</sub> initial concentration: (a) under 23 W/m<sup>2</sup>, and (b) under 100 W/m<sup>2</sup>.

### S.2. CO<sub>2</sub> reduction results

Figure S.7. shows the CO<sub>2</sub> photoreduction experiments results in a graphical format. The error bars correspond to the minimum and maximum values for each condition studied. Figure S.7. (a) corresponds to the tests at 100% CO<sub>2</sub> initial concentration, Figure S.7 (b) to the tests under 12% CO<sub>2</sub> initial concentration, and Figure S.7. (c) to the tests at an initial CO<sub>2</sub> concentration of 6%.

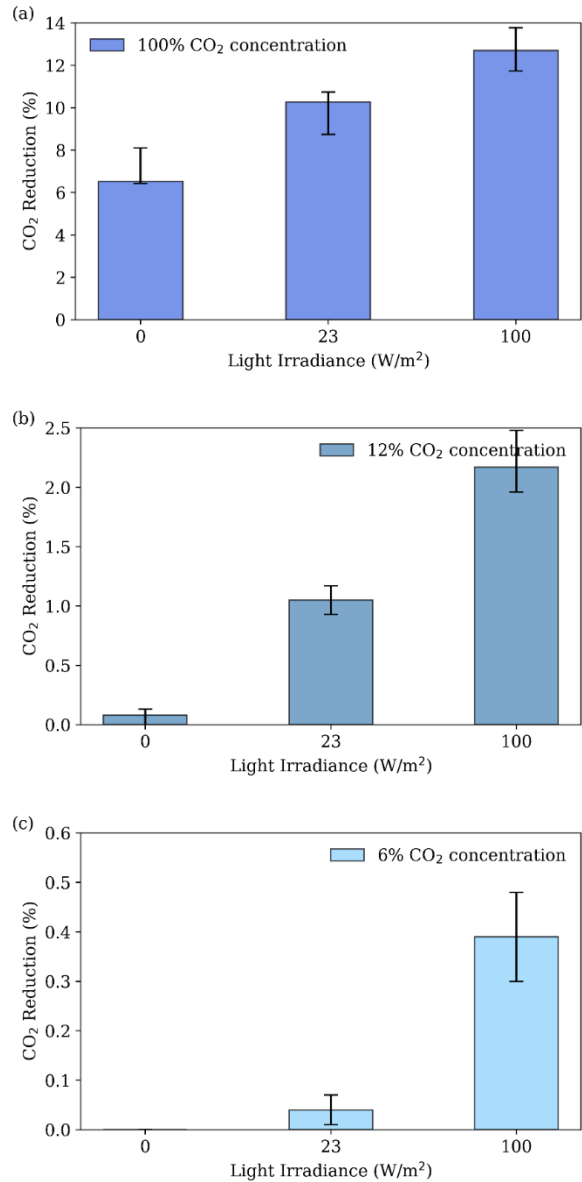

**Figure S.7.** Results from the 3-hour CO<sub>2</sub> reduction experiments under different light irradiances: (a) samples exposed to 100% CO<sub>2</sub>; (b) samples exposed to 12% CO<sub>2</sub>; and (c) samples exposed to 6% CO<sub>2</sub>.

### S.3. 2023 Global Horizontal Irradiance data set

The complete 2023 Global Horizontal Irradiance (GHI) in W/m<sup>2</sup> per hour data set, obtained from National Solar Radiation Data Base (NSRDB) provided by the National Renewable Energy Laboratory (NREL) is presented below, for each location considered, separated by quarters: (i) Phoenix, AZ (Figure S.8), (ii) Seattle, WA (Figure

S.9); (iii) Charlotte, NC (Figure S.10); and (iv) Indianapolis, IN (Figure S.11). These data was used to compute the yearly CO<sub>2</sub> reduction using the proposed models.

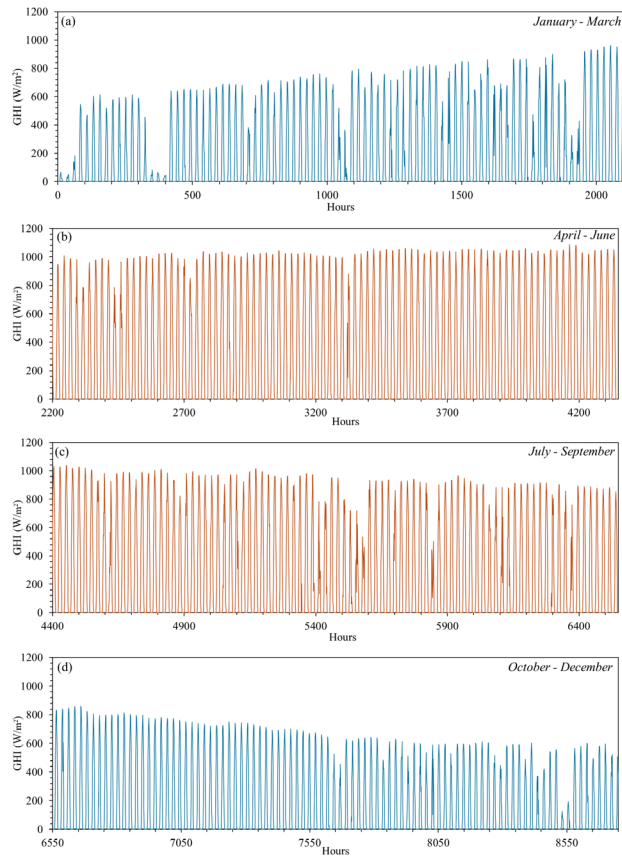

**Figure S.8.** GHI data from the NREL database for the 2023 year in Phoenix, AZ: (a) January to March; (b) April to June; (c) July to September; and (d) October to December.

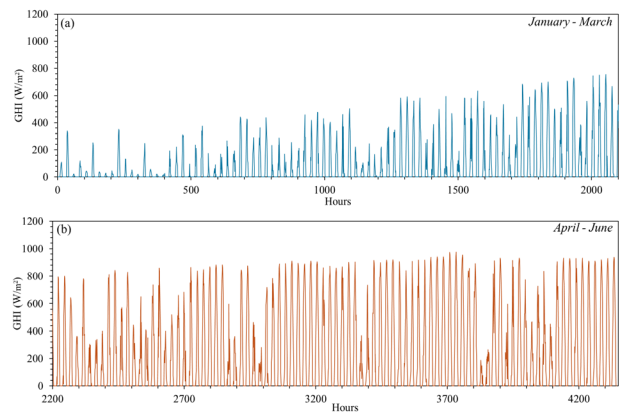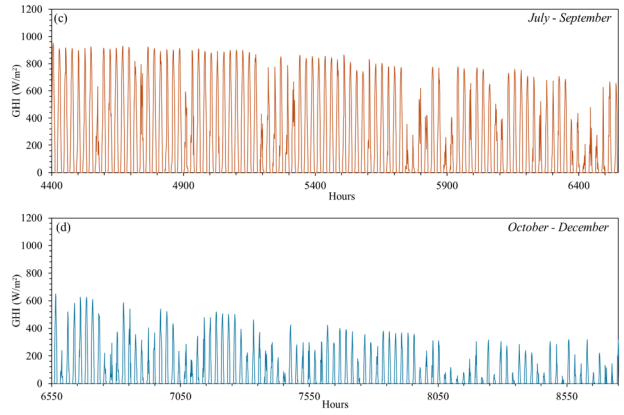

**Figure S.9.** GHI data from the NREL database for the 2023 year in Seattle, WA: (a) January to March; (b) April to June; (c) July to September; and (d) October to December.

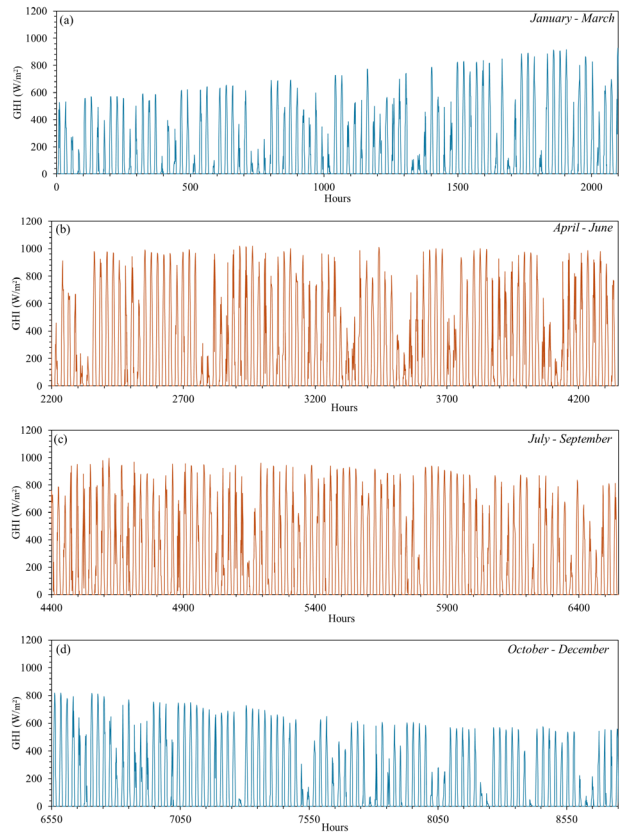

**Figure S.10.** GHI data from the NREL database for the 2023 year in Charlotte, NC: (a) January to March; (b) April to June; (c) July to September; and (d) October to December.

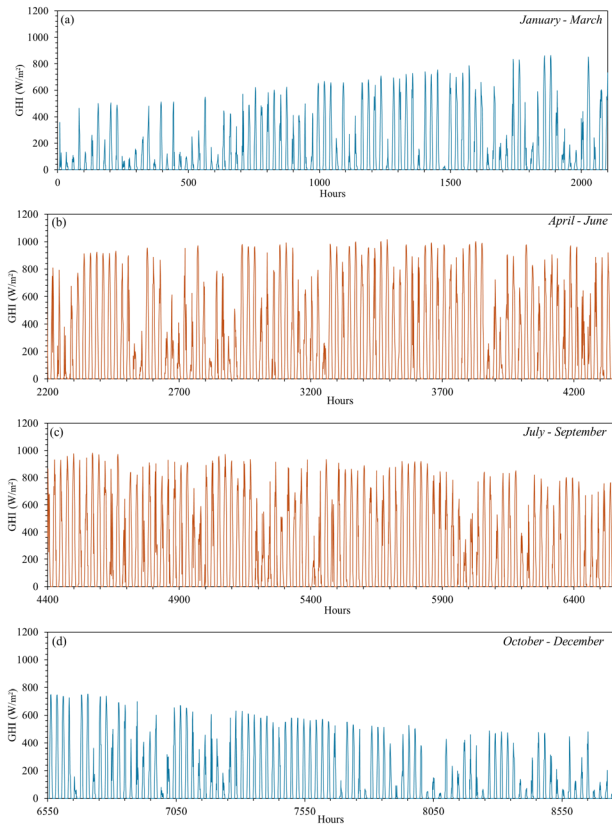

**Figure S.11.** GHI data from the NREL database for the 2023 year in Indianapolis, IN: (a) January to March; (b) April to June; (c) July to September; and (d) October to December.
